# Supplementary material for: Aerial-trained deep learning networks for surveying cetaceans from satellite imagery
Source: PubMed Central journal article supplement (PMC6772036; doi:10.1371/journal.pone.0212532), 2019-10-01

## S2 Fig. Confusion matrices for model versions.

Confusion matrices for each trained model – combinations of model type (ResNet-18, ResNet-34, ResNet-152, DenseNet) and learning rate (LR=0.2, 0.1, 0.01, 0.001, 0.0009). See Table 2 in-text.

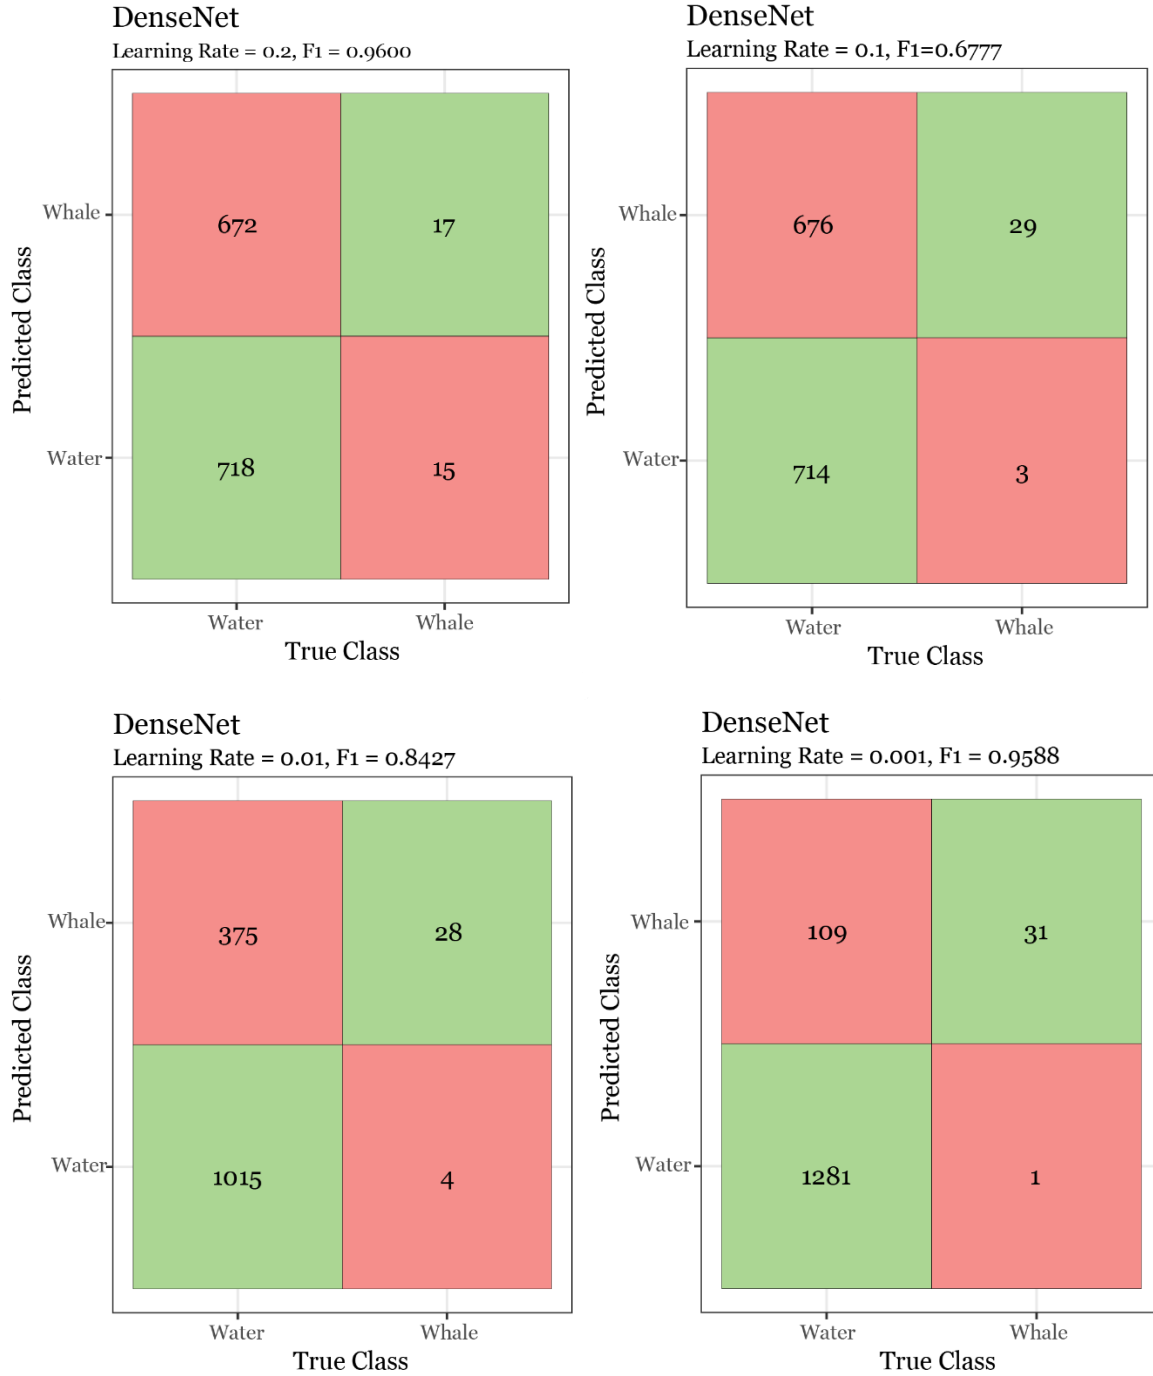

### DenseNet

Learning Rate = 0.0009, F1 = 0.9112

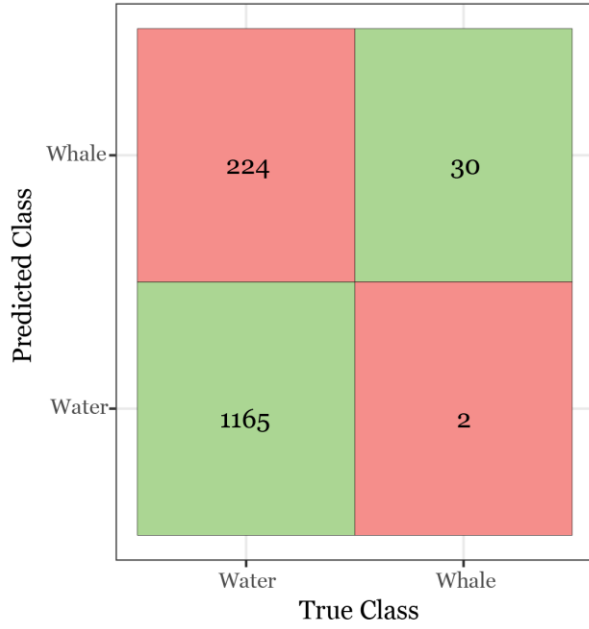

### ResNet-18

Learning Rate = 0.2, F1 = 0.8324

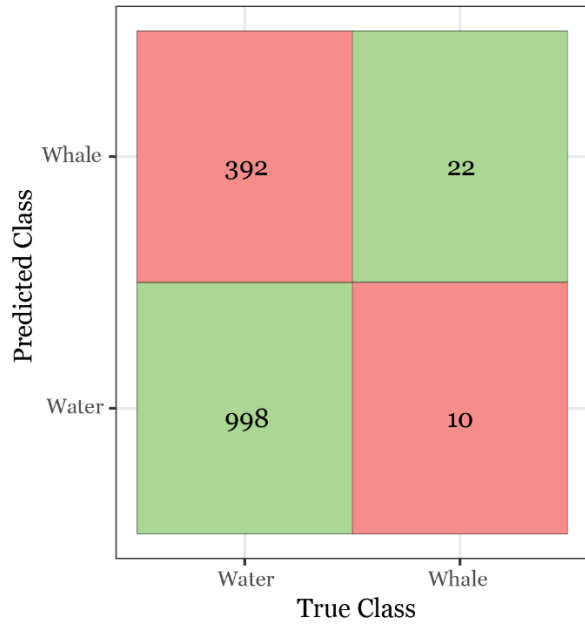

### ResNet-18

Learning Rate = 0.1, F1 = 0.8170

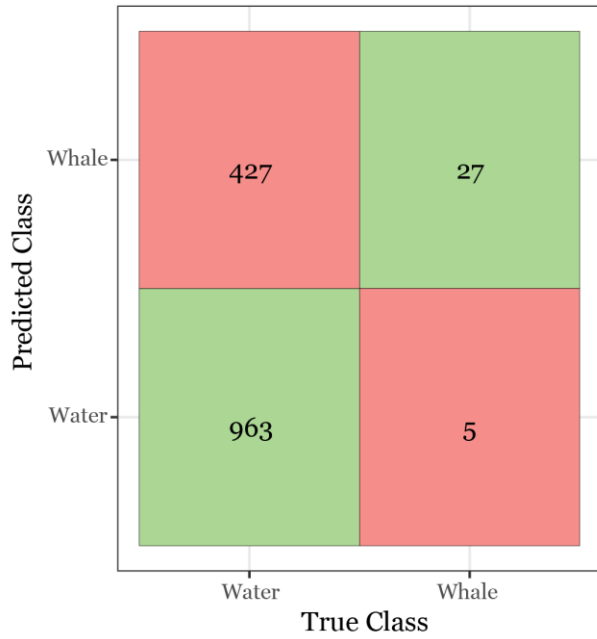

### ResNet-18

Learning Rate = 0.01, F1 = 0.8942

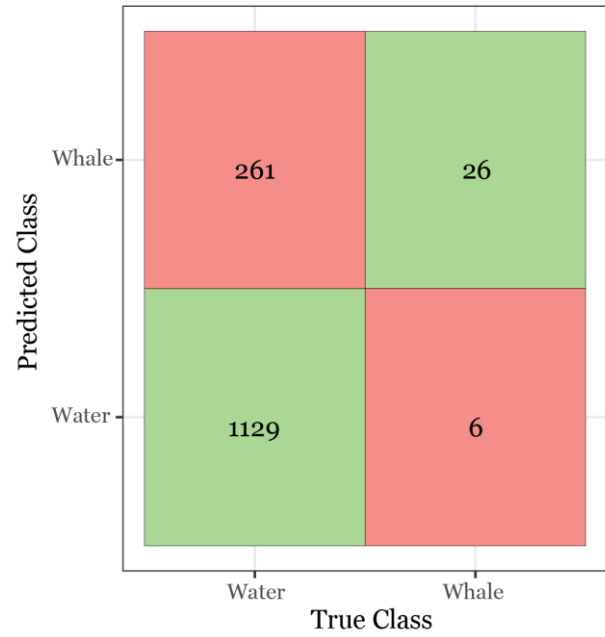

### ResNet-18

Learning Rate = 0.001, F1 = 0.9498

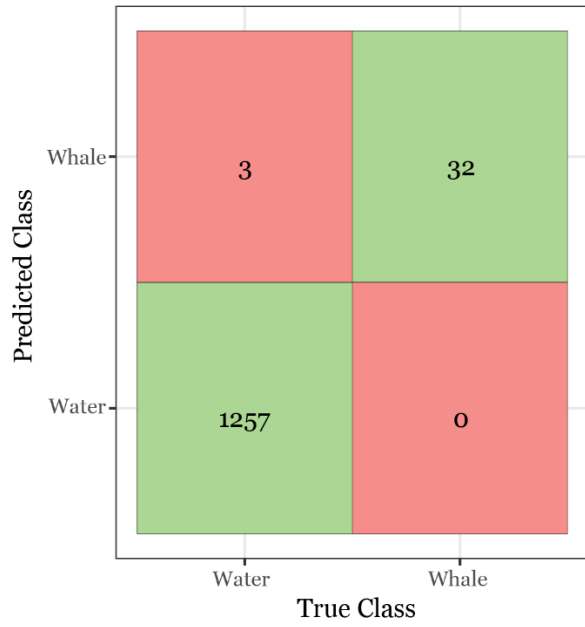

### ResNet-18

Learning Rate = 0.0009, F1 = 0.9112

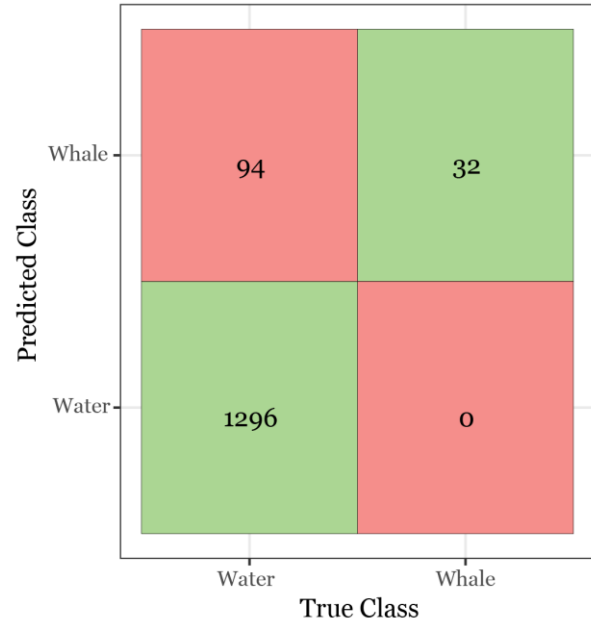

ResNet-34

Learning Rate = 0.0009, F1 = 0.9646

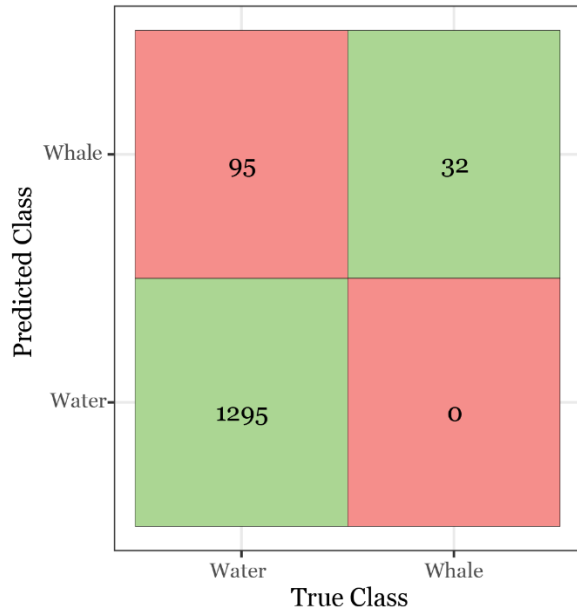

ResNet-34

Learning Rate = 0.001, F1 Score = 0.958

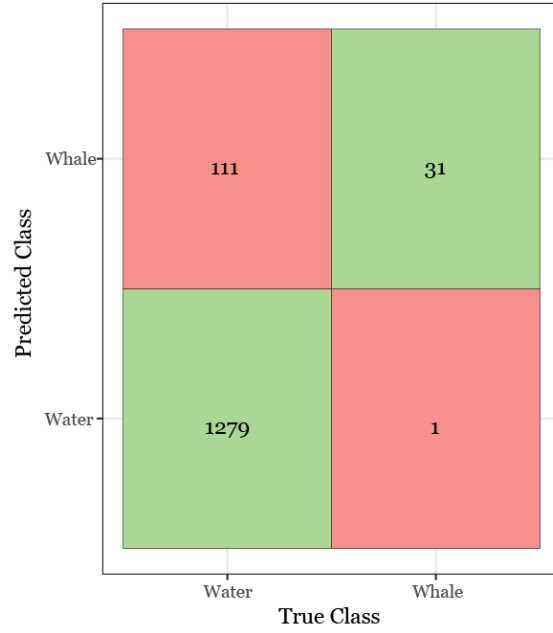

ResNet-34

Learning Rate = 0.01, F1 = 0.9600

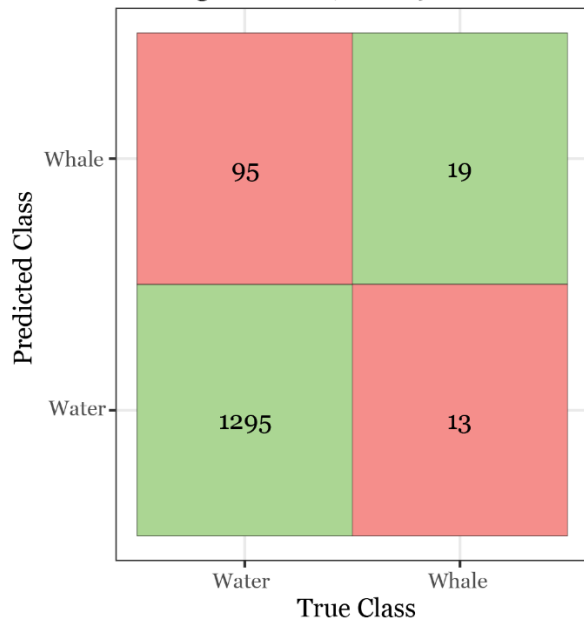

ResNet-34

Learning Rate = 0.1, F1 Score = 0.8255

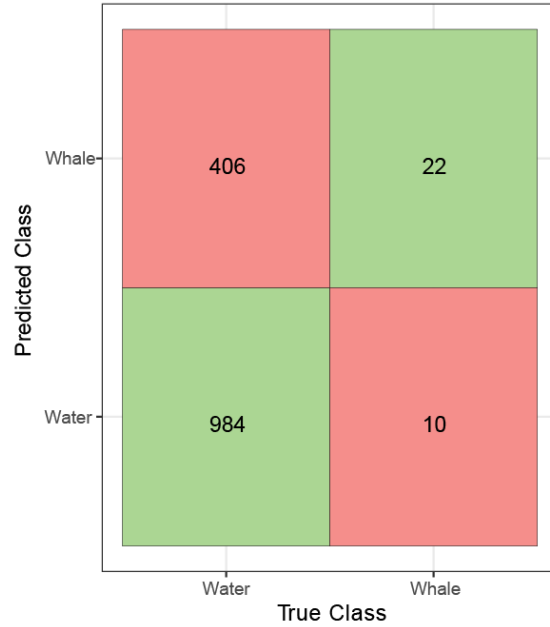

ResNet-34

Learning Rate = 0.2, F1 Score = 0.9842

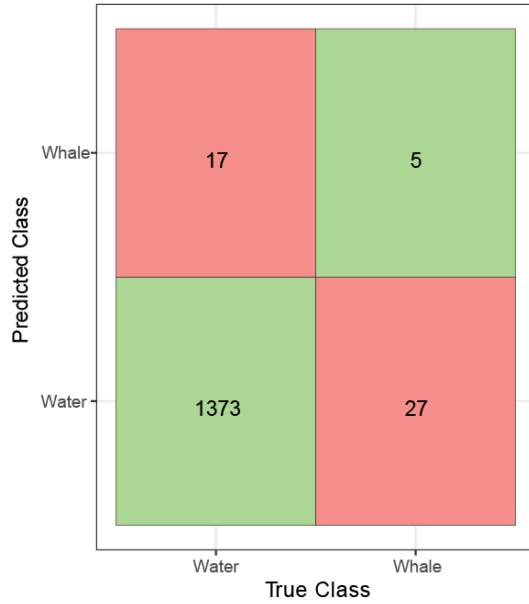

ResNet-152

Learning Rate = 0.0009, F1 Score = 0.9530

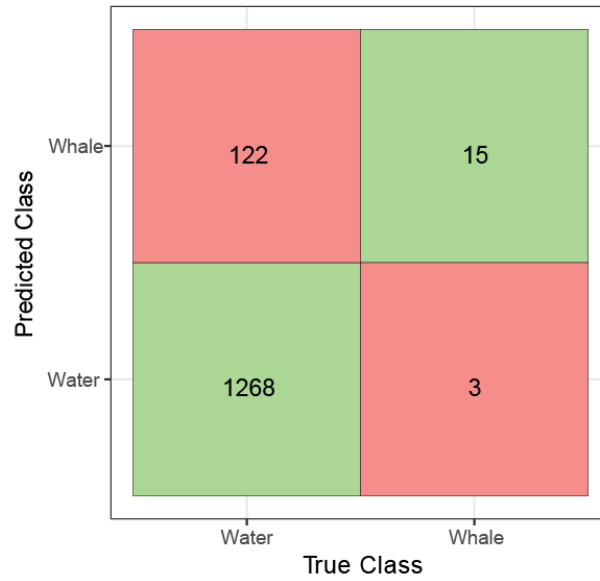

ResNet-152

Learning Rate = 0.001, F1 Score = 0.9490

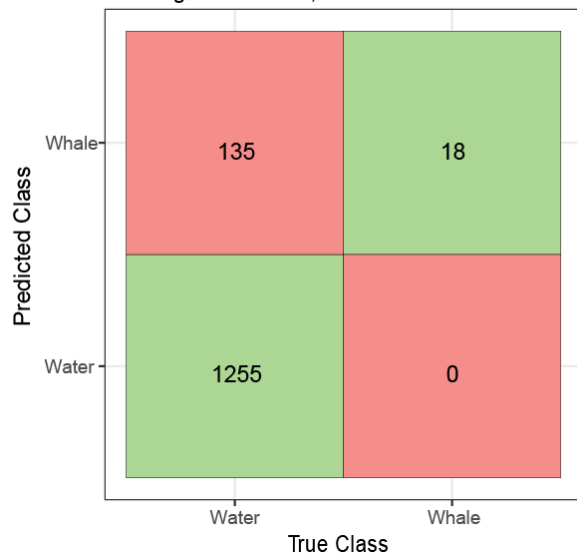

ResNet-152

Learning Rate = 0.01, F1 Score = 0.4075

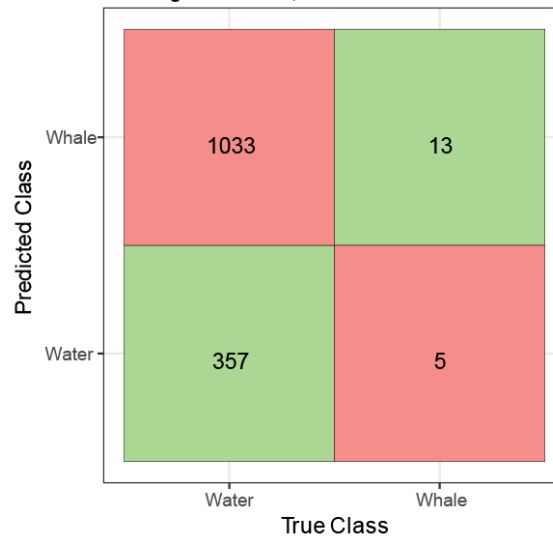

ResNet-152

Learning Rate = 0.1, F1 Score = 0.9906

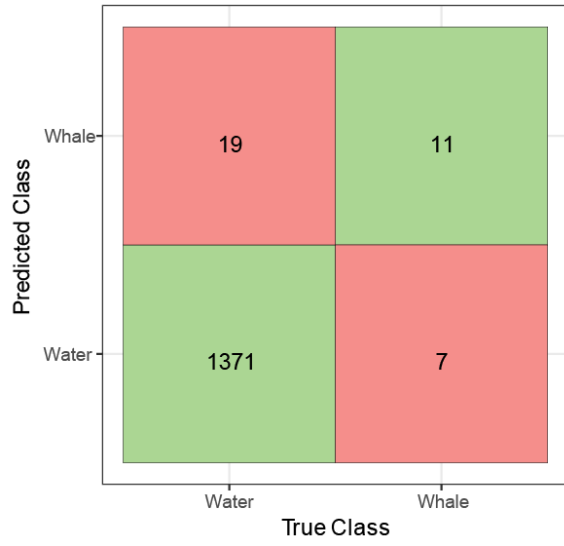

ResNet-152

Learning Rate = 0.2, F1 Score = 0.9829

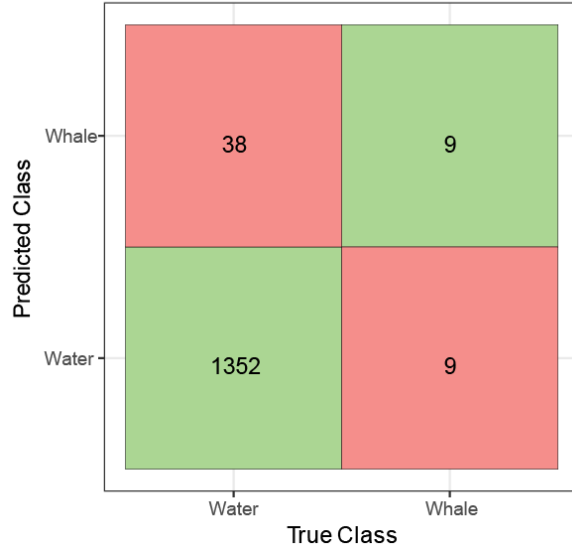

Supplement: pone.0212532.s015.pdf [file pone.0212532.s015.pdf]
