# Supplementary material for: Aerial-trained deep learning networks for surveying cetaceans from satellite imagery
Source: PubMed Central journal article supplement (PMC6772036; doi:10.1371/journal.pone.0212532), 2019-10-01
Supplement: pone.0212532.s001.pdf [file pone.0212532.s001.pdf]

**S1 Table. Satellite Imagery.**

We acquired imagery from Digital Globe’s WorldView-3 sensor via the Digital Globe Foundation.

See <https://discover.digitalglobe.com/> for details on individual scenes and a preview.

| <b>Scene ID</b>  | <b>Location</b>             | <b>Date</b>  |
|------------------|-----------------------------|--------------|
| 1040010003121A00 | Peninsula Valdes, Argentina | 14 Oct. 2014 |
| 1040010029924200 | Maui, Hawaii, USA           | 13 Feb. 2013 |
