# Supplementary material for: Aerial-trained deep learning networks for surveying cetaceans from satellite imagery
Source: PubMed Central journal article supplement (PMC6772036; doi:10.1371/journal.pone.0212532), 2019-10-01
Supplement: pone.0212532.s002.pdf [file pone.0212532.s002.pdf]

## S2 Table. Python packages.

The code requires packages for Python 3 to be pre-installed.

Most can be installed via *pip install <>* or *conda install <>*.

For PyTorch, go to <https://pytorch.org/get-started/locally/> to determine which version to install.

| <b>Package</b> | <b>version</b> |
|----------------|----------------|
| Conda          | 4.5.8          |
| Dominante      | 2.3.1          |
| Numpy          | 1.15.2         |
| Pandas         | 0.24.2         |
| Pillow         | 5.1.0          |
| Scikit-image   | 0.14.0         |
| Scikit-learn   | 0.19.1         |
| Scipy          | 1.1.0          |
| Torch          | 0.4.0          |
| Torchfile      | 0.1.0          |
| Torchvision    | 0.2.1          |
