# Supplementary material for: Aerial-trained deep learning networks for surveying cetaceans from satellite imagery
Source: PubMed Central journal article supplement (PMC6772036; doi:10.1371/journal.pone.0212532), 2019-10-01

**B**

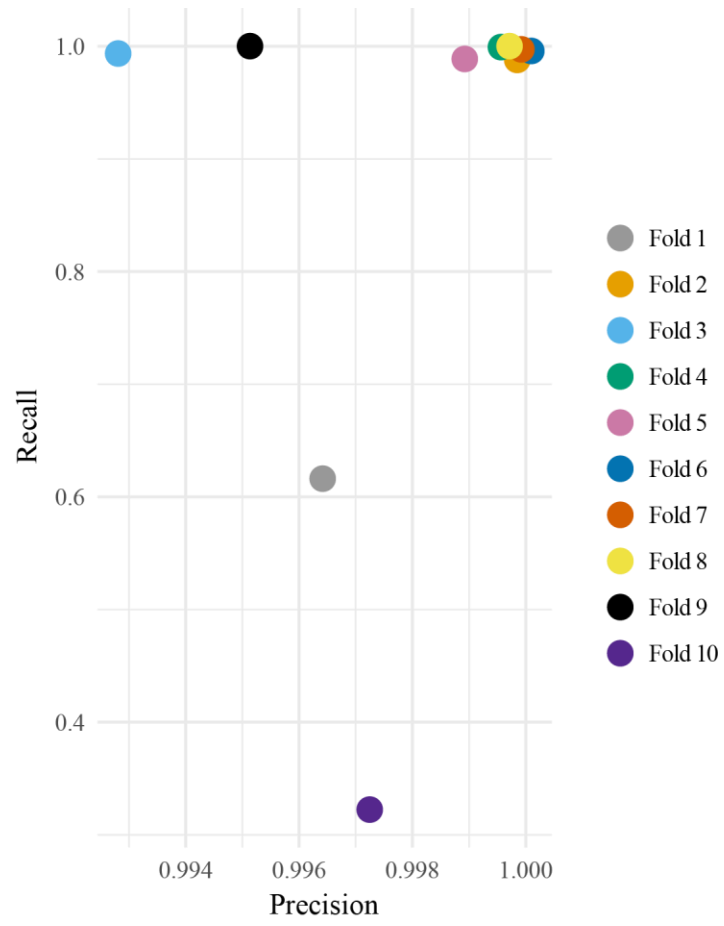

Supplement: pone.0212532.s014.pdf [file pone.0212532.s014.pdf]
