# Supplementary material for: Aerial-trained deep learning networks for surveying cetaceans from satellite imagery
Source: PLoS One. 2019 Oct 1;14(10):e0212532. doi: 10.1371/journal.pone.0212532 (PMC6772036; doi:10.1371/journal.pone.0212532)
Supplement: S9 File — Accuracy and loss at different learning rates, used to create Fig 3A. (CSV) [file pone.0212532.s011.csv]

Value	Label	Prediction	Model	LearningRate
1165	Water	Water	densenet	0.0009
30	Whale	Whale	densenet	0.0009
2	Whale	Water	densenet	0.0009
224	Water	Whale	densenet	0.0009
1281	Water	Water	densenet	0.001
31	Whale	Whale	densenet	0.001
1	Whale	Water	densenet	0.001
109	Water	Whale	densenet	0.001
1015	Water	Water	densenet	0.01
28	Whale	Whale	densenet	0.01
4	Whale	Water	densenet	0.01
375	Water	Whale	densenet	0.01
714	Water	Water	densenet	0.1
29	Whale	Whale	densenet	0.1
3	Whale	Water	densenet	0.1
676	Water	Whale	densenet	0.1
718	Water	Water	densenet	0.2
17	Whale	Whale	densenet	0.2
15	Whale	Water	densenet	0.2
672	Water	Whale	densenet	0.2
1290	Water	Water	resnet-18	0.0006
14	Whale	Whale	resnet-18	0.0006
4	Whale	Water	resnet-18	0.0006
100	Water	Whale	resnet-18	0.0006
1351	Water	Water	resnet-18	0.0005
14	Whale	Whale	resnet-18	0.0005
4	Whale	Water	resnet-18	0.0005
39	Water	Whale	resnet-18	0.0005
1300	Water	Water	resnet-18	0.0007
13	Whale	Whale	resnet-18	0.0007
5	Whale	Water	resnet-18	0.0007
90	Water	Whale	resnet-18	0.0007
1282	Water	Water	resnet-18	0.0008
13	Whale	Whale	resnet-18	0.0008
5	Whale	Water	resnet-18	0.0008
108	Water	Whale	resnet-18	0.0008
1296	Water	Water	resnet-18	0.0009
32	Whale	Whale	resnet-18	0.0009
0	Whale	Water	resnet-18	0.0009
94	Water	Whale	resnet-18	0.0009
1080	Water	Water	resnet-18	0.00001
17	Whale	Whale	resnet-18	0.00001
1	Whale	Water	resnet-18	0.00001
310	Water	Whale	resnet-18	0.00001
1257	Water	Water	resnet-18	0.001
32	Whale	Whale	resnet-18	0.001
0	Whale	Water	resnet-18	0.001
3	Water	Whale	resnet-18	0.001
1129	Water	Water	resnet-18	0.01
26	Whale	Whale	resnet-18	0.01
6	Whale	Water	resnet-18	0.01
261	Water	Whale	resnet-18	0.01
963	Water	Water	resnet-18	0.1
27	Whale	Whale	resnet-18	0.1
5	Whale	Water	resnet-18	0.1
427	Water	Whale	resnet-18	0.1
998	Water	Water	resnet-18	0.2
22	Whale	Whale	resnet-18	0.2
10	Whale	Water	resnet-18	0.2
392	Water	Whale	resnet-18	0.2
1295	Water	Water	resnet-34	0.01
19	Whale	Whale	resnet-34	0.01
13	Whale	Water	resnet-34	0.01
95	Water	Whale	resnet-34	0.01
1295	Water	Water	resnet-34	0.0009
32	Whale	Whale	resnet-34	0.0009
0	Whale	Water	resnet-34	0.0009
95	Water	Whale	resnet-34	0.0009
984	Water	Water	resnet-34	0.1
22	Whale	Whale	resnet-34	0.1
10	Whale	Water	resnet-34	0.1
406	Water	Whale	resnet-34	0.1
1373	Water	Water	resnet-34	0.2
5	Whale	Whale	resnet-34	0.2
27	Whale	Water	resnet-34	0.2
17	Water	Whale	resnet-34	0.2
1279	Water	Water	resnet-34	0.001
31	Whale	Whale	resnet-34	0.001
1	Whale	Water	resnet-34	0.001
111	Water	Whale	resnet-34	0.001
1248	Water	Water	resnet-34	0.0008
30	Whale	Whale	resnet-34	0.0008
2	Whale	Water	resnet-34	0.0008
142	Water	Whale	resnet-34	0.0008
1119	Water	Water	resnet-34	0.0007
32	Whale	Whale	resnet-34	0.0007
0	Whale	Water	resnet-34	0.0007
271	Water	Whale	resnet-34	0.0007
1138	Water	Water	resnet-34	0.0006
32	Whale	Whale	resnet-34	0.0006
0	Whale	Water	resnet-34	0.0006
252	Water	Whale	resnet-34	0.0006
1289	Water	Water	resnet-34	0.0005
31	Whale	Whale	resnet-34	0.0005
1	Whale	Water	resnet-34	0.0005
101	Water	Whale	resnet-34	0.0005
1172	Water	Water	resnet-34	0.00001
32	Whale	Whale	resnet-34	0.00001
0	Whale	Water	resnet-34	0.00001
218	Water	Whale	resnet-34	0.00001
1003	Water	Water	resnet-152	0.00001
32	Whale	Whale	resnet-152	0.00001
0	Whale	Water	resnet-152	0.00001
387	Water	Whale	resnet-152	0.00001
1108	Water	Water	resnet-152	282
32	Whale	Whale	resnet-152	0.0005
0	Whale	Water	resnet-152	0.0005
282	Water	Whale	resnet-152	0.0005
1303	Water	Water	resnet-152	0.0006
32	Whale	Whale	resnet-152	0.0006
0	Whale	Water	resnet-152	0.0006
87	Water	Whale	resnet-152	0.0006
1196	Water	Water	resnet-152	0.0007
32	Whale	Whale	resnet-152	0.0007
0	Whale	Water	resnet-152	0.0007
194	Water	Whale	resnet-152	0.0007
1262	Water	Water	resnet-152	0.0008
32	Whale	Whale	resnet-152	0.0008
0	Whale	Water	resnet-152	0.0008
128	Water	Whale	resnet-152	0.0008
1242	Water	Water	resnet-152	0.0009
32	Whale	Whale	resnet-152	0.0009
0	Whale	Water	resnet-152	0.0009
146	Water	Whale	resnet-152	0.0009
1270	Water	Water	resnet-152	0.001
32	Whale	Whale	resnet-152	0.001
0	Whale	Water	resnet-152	0.001
118	Water	Whale	resnet-152	0.001
982	Water	Water	resnet-152	0.01
28	Whale	Whale	resnet-152	0.01
4	Whale	Water	resnet-152	0.01
408	Water	Whale	resnet-152	0.01
1248	Water	Water	resnet-152	0.1
15	Whale	Whale	resnet-152	0.1
17	Whale	Water	resnet-152	0.1
142	Water	Whale	resnet-152	0.1
1321	Water	Water	resnet-152	0.2
13	Whale	Whale	resnet-152	0.2
19	Whale	Water	resnet-152	0.2
69	Water	Whale	resnet-152	0.2
